# Supplementary material for: Horizontal transfer and proliferation of Tsu4 in Saccharomyces paradoxus
Source: PubMed Central journal article supplement (PMC5998506; doi:10.1186/s13100-018-0122-7), 2018-06-12
Supplement: 13100_2018_122_MOESM8_ESM.pdf [file 13100_2018_122_MOESM8_ESM.pdf]

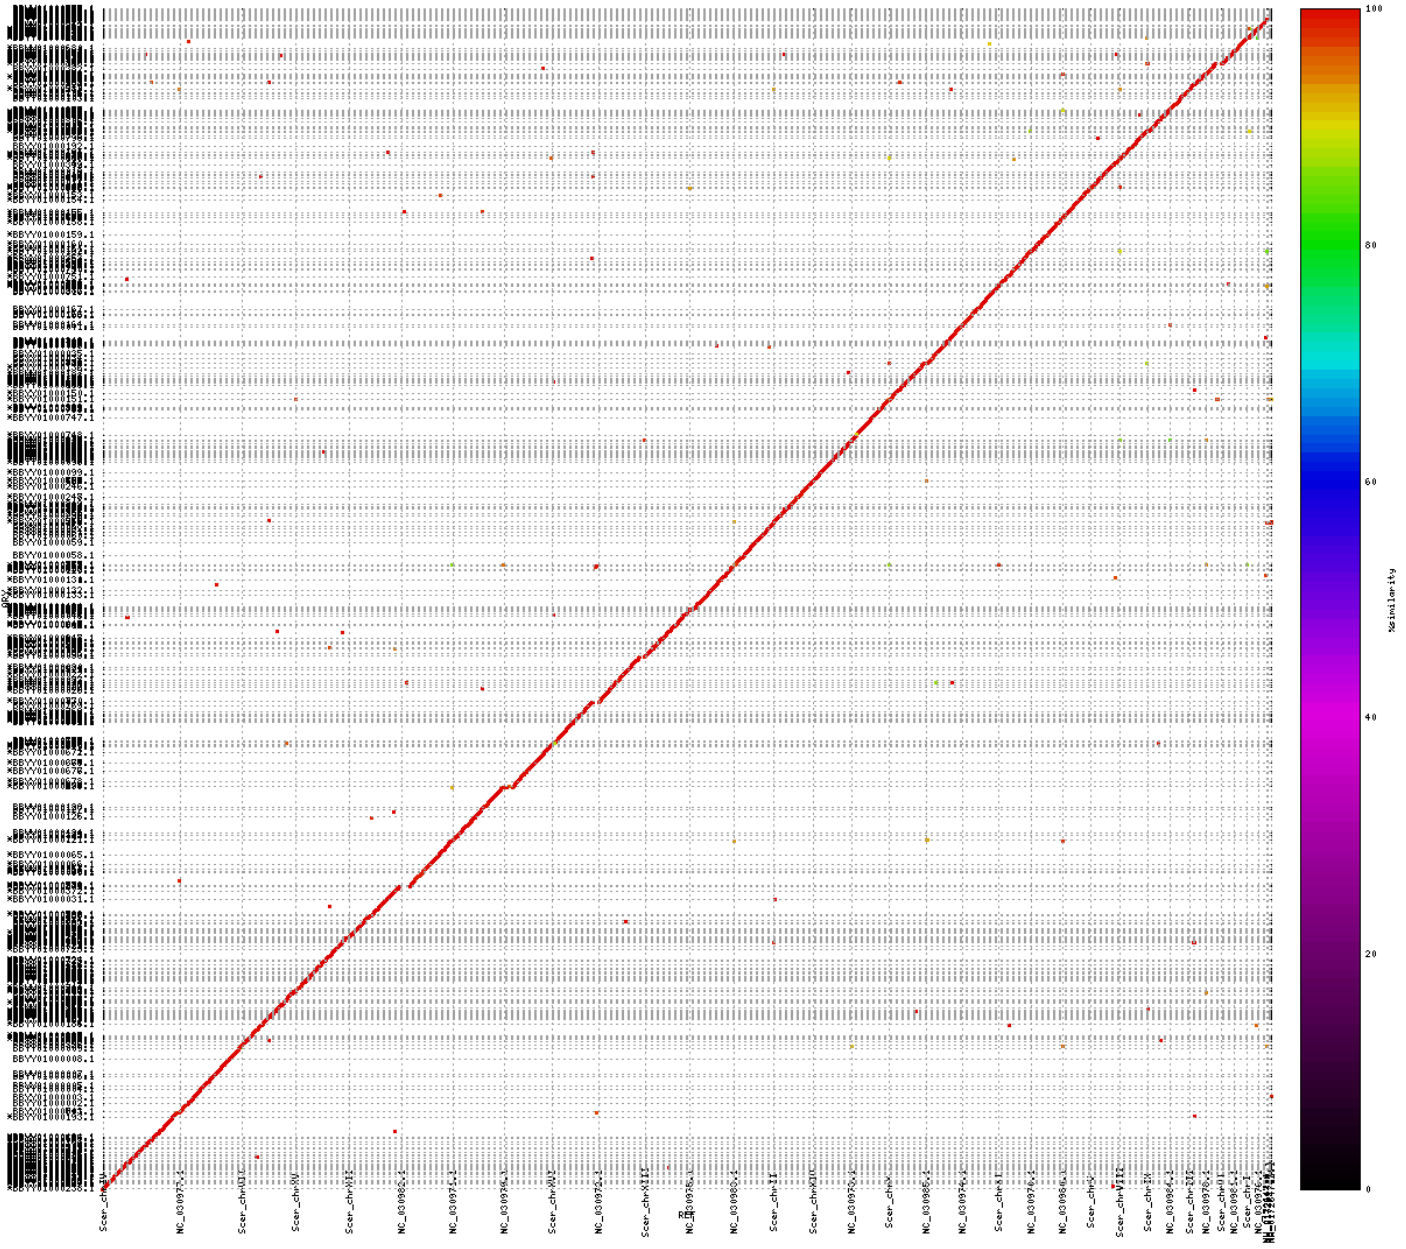

Recombination

100

80

60

40

20

0
